# Supplementary material
Source: HighWire-hosted journal article supplement (https://www.cmaj.ca/highwire/filestream/78035/field_highwire_adjunct_files/0/200418-image-1-at.pdf)

**Appendix 1 (as submitted by the authors): Supplementary Figure 1.**

Biopsy of the skin demonstrating perivascular infiltrate with numerous neutrophils, some eosinophils (arrowhead), nuclear dust, abundant extravasated erythrocytes (arrow), and hemorrhage (hematoxylin and eosin staining, original magnification x200). These findings are compatible with leukocytoclastic vasculitis.

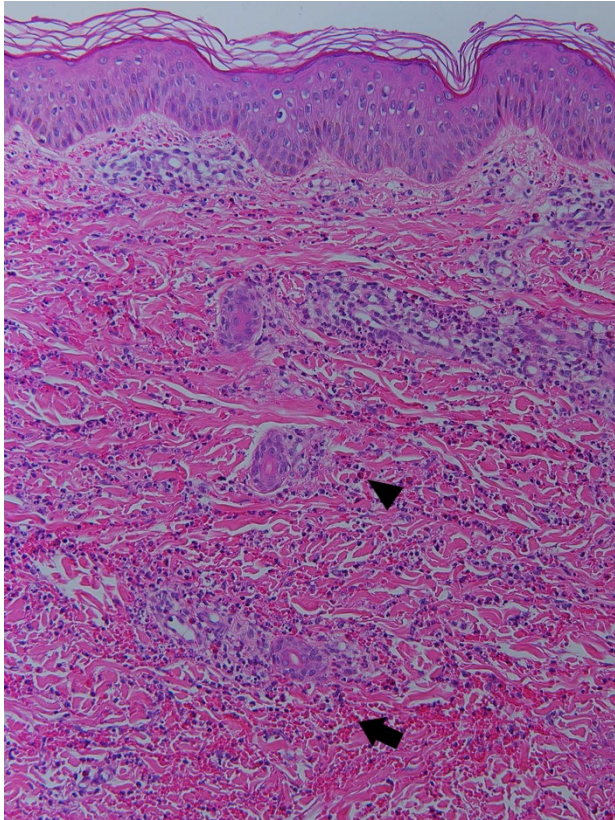

Supplement: 200418-image-1-at.pdf [file 200418-image-1-at.pdf]
